# Supplementary material
Source: ML conference proceedings conference paper supplement (https://aclanthology.org/D19-1605)
Supplement: Attachment [file D19-1605.Attachment.zip]

## Appendix A: Data Collection Instructions

Rewrite each question in a dialogue so it can be understood by itself without looking at the rest of the dialogue.

- In the given conversation between a student who asks questions about a topic of a Wikipedia article and a teacher who is answering the questions, each question can be understood as part of the ongoing dialogue. Edit each question so that it makes sense by itself without looking at the rest of the dialogue. Think how you would ask the same question to someone who has no idea about what the dialogue is about and has never seen any of the previous utterances and still get the same answer. For example, the question ‘What was he like in that episode?’ cannot be understood without knowing what ‘he’ and ‘that episode’ refer to. Both can be figured out by looking at the dialogue. If we edited the question to ‘What was Daffy Duck like in Porky’s Duck Hunt?’, it would then make sense by itself.
- Reading and understanding all previous utterances is very important. Do not just look for things like ‘she’ and ‘that’ and replace them. For example, the question Who was the star? is still unclear. We need to specify ‘star in what movie, series, episode, ..etc.?’ as in Who was the star in Porky’s Duck Hunt?. To make sure the edits are based on understanding the conversations rather than naive replacements, we will manually review a random group of the edits before accepting the work. We also run pretty mild checks on the edits before allowing the HIT to be submitted. The checks are meant to help you make valid edits, but they still can miss some invalid edits (rather than being too strict). So, do not count only on passing the checks and make sure that each edit makes sense by itself.
- Questions should stay in a natural-sounding english after editing. Do not use new words other than those in the conversation unless it is necessary. Copy from previous questions, answers and conversation topic as often as possible. Never use any information provided after a question is asked. Only use what was provided up to the question you are editing. When editing a question, keep its original structure whenever possible. For example, do not change ‘Did they arrest him?’ to ‘Was Alex arrested?’, but rather keep the original structure and do ‘Did they arrest Alex?’. Do not come up with a different or better question. Stick to the given wording. It is okay to have pronouns in an edit as long as the edit has enough information about what the pronouns refer to. For example ‘Where was Carroll when she joined the american party?’ is a perfectly fine edit.
- Pay special attention to questions that ask if there is anything/anyone else or asking for telling more about something. It is important to mention in your edit “anything/anyone else besides what/ whom”. For example, ‘Are there any other interesting aspects about this article?’ should be edited to something like ‘Besides Death of a Ladies Man and End of the Century, are there any other interesting aspects about this article?’ as in example 2 below. Notice that it is okay to keep ‘this article’ without replacing it with something else.
- If a question can be understood without looking at the rest of the conversation, mark it as Understandable alone. Do not make unnecessary edits. Try to keep the edits short as long as they make sense each by itself. Although typos are quite rare, please fix any typos you encounter.
- Never look up additional information on the web. Only use the given conversations.
- We show one question at a time. After editing or marking a question as Understandable alone, we show its following question. After all questions are edited, we allow you to submit the HIT and optionally provide any feedback you have on the HIT.

## Appendix B: Data Collection Interface

Topic: Anna Vissi, 1983-1989: Collaboration with Nikos Karvelas

8 questions in total.

Question 1: what happened in 1983? ☐ Understandable alone

Edit:

[what happened in 1983 to Anna Vissi?](#)

Answer: In May 1983, she married Nikos Karvelas, a composer,

Question 2: did they have any children? ☐ Understandable alone

Edit:

[did Anna and Nikos have any children?](#)

Answer: in November she gave birth to her daughter Sofia.

Question 3: did she have any other children? ☐ Understandable alone

Make sure you mention other than what/whom in your edit using one of "other than", "in addition to", "aside from", "besides", "together with", "along with". [More Details?](#)

Edit:

[did she have any other children?](#)

Always remember:

- Each question should make sense completely by itself.
- Just replacing pronouns **is not enough**.
- Copy from the topic, **previous** questions and answers as often as possible.
- **Never use any information provided after a question is asked** (below the edit box).
- **Carefully use Understandable alone.**
- **Do not come up with a different or better question.**
- Never look up additional information on the web.
- Do not count only on passing the checks. **We review the edits manually.**
- When in doubt, check the instructions.

Figure 1: Data collection interface. The conversation has eight questions in total. We show one question at a time to encourage crowdworkers only use the *previous* utterances for the rewriting. After the eight questions are rewritten, we enable submitting the HIT. We show question-specific instructions as in question three to remind crowdworkers about relevant instructions. A compact set of the full instructions are shown on the right. Detailed instructions can be displayed by clicking on the “view instructions” button.
