# Supplementary material
Source: ML conference proceedings conference paper supplement (https://aclanthology.org/D19-1605)
Supplement: Attachment [file D19-1605.Attachment.zip]

Archive with 3 entries (2 files):
- 2019_emnlp_sequentialqa.appendix.pdf
- __MACOSX/
- __MACOSX/._2019_emnlp_sequentialqa.appendix.pdf
